# Supplementary material
Source: publisher figshare collection journal article supplement (https://rs.figshare.com/ndownloader/files/32881415)
Supplement: Supplementary file 1 [file 32881415]

**S1 Fig. Dynamics on Scale-free network .**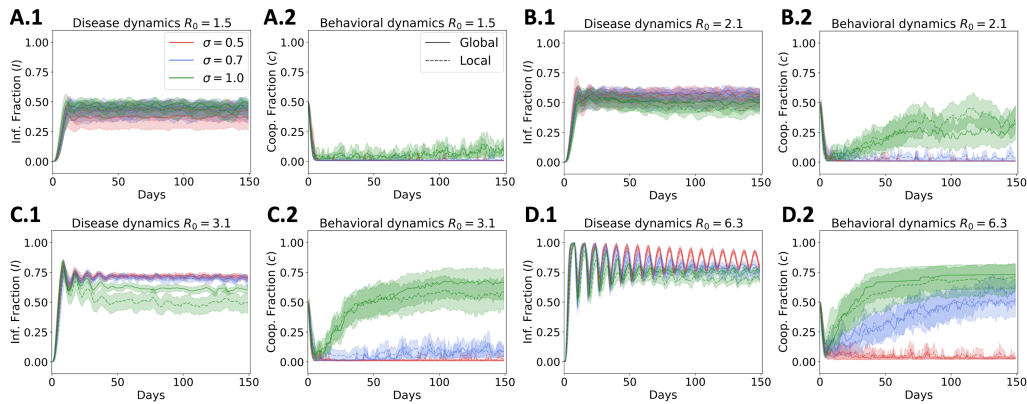

**Supplementary Figure 1.** Temporal evolution of scale-free social networks in different contagion scenarios on a scale-free network with 1000 nodes. **A**  $R_0 = 1.5$ . **B**  $R_0 = 2.1$ . **C**  $R_0 = 3.1$ . **D**  $R_0 = 6.3$ . Awareness  $\sigma$  is varied for 0.5, 0.7 and 1.0 accounting for a scenario of half, partial and full disease awareness (color-coded), respectively. For all lines represent the median of the 100 simulations and ribbons represent the 90% quantiles. **.1** shows the infected fraction in time  $I(t)/N$  and the **.2** shows the cooperators fraction ( $c$ ). The solid line corresponds to running the network model in the global setting while dashed line corresponds to the local setting.

**S2 Fig. Dynamics on mechanistic - ODEs model.**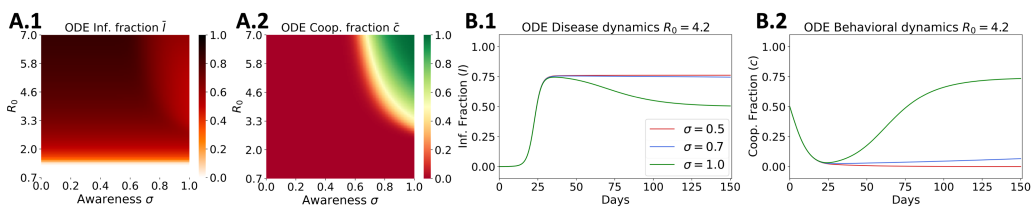

**Supplementary Figure 2.** Effect of the basic reproductive number  $R_0$  and awareness  $\sigma$  on the infection and cooperation in a mechanistic model. **A.1** Stable state of infected fraction  $\bar{I}$  (color coded). **A.2** Stable state of cooperating fraction  $\bar{c}$  (color coded). **B.1** Temporal dynamics of disease and **B.2** behavior in a ODE implementation. The basic reproductive number  $R_0$  is fixed to 4.2 and awareness  $\sigma$  is varied for 0.5, 0.7 and 1.0 accounting for a scenario of half, partial and full disease awareness (color-coded), respectively.

**S3 Fig. Dynamics on Small World and Grid network.**

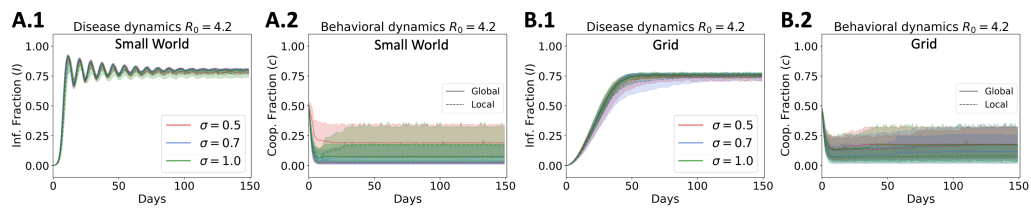

**Supplementary Figure 3. (Supplementary material)** Temporal behavior of homogeneous social network of 1000 individuals. The value for  $R_0$  is fixed to 4.2 and  $\sigma$  is varied for 0.5, 0.7 and 1.0 accounting for a scenario of half, partial and full disease awareness, respectively. **A.1** Small World graph disease and **A.2** behavioral dynamics. **B.1** Grid graph disease and **B.2** behavioral dynamics.
